# Supplementary material for: Multifaceted properties of TiO2 nanoparticles synthesized using Mangifera indica and Azadirachta indica plant extracts: antimicrobial, antioxidant, and non-linear optical activity investigation for sustainable agricultural applications
Source: Royal Society of Chemistry journal article supplement (doi:10.1039/d3ma00414g), 2024-01-01
Supplement: d3ma00414g1.pdf [file d3ma00414g1.pdf]

# Multifaceted Properties of TiO<sub>2</sub> Nanoparticles Synthesized via *Mangifera indica* and *Azadirachta indica* Plant Extracts: Antimicrobial, Antioxidant, and Non-linear Optical Investigations for Sustainable Agriculture Applications

Archana Rana<sup>1,2</sup>, Saurabh Pathak<sup>3</sup>, Kapil Kumar<sup>1,2</sup>, Anjali Kumari<sup>4,5</sup>, Samridhi Chopra<sup>1,2</sup>, Mahesh Kumar<sup>1,2</sup>, Deeba Kamil<sup>5</sup>, Ritu Srivastava<sup>1,2</sup>, Sang-Koog Kim<sup>3</sup>, Rajni Verma<sup>3,\*</sup>, and Shailesh N. Sharma<sup>1,2\*</sup>

<sup>1</sup> CSIR-National Physical Laboratory, Dr. K.S. Krishnan Marg, New Delhi 110012, India

<sup>2</sup> Academy of Scientific and Innovative Research (AcSIR), Ghaziabad, 201002, India

<sup>3</sup>National Creative Research Initiative Center for Spin Dynamics and SW Devices, Nanospinics Laboratory, Research Institute of Advanced Materials, Department of Materials Science and Engineering, Seoul National University, Seoul 151-744, South Korea

<sup>4</sup>SHUATS- Sam Higginbottom University of Agriculture, Technology, and Sciences, Allahabad, Uttar Pradesh

<sup>5</sup>IARI-Indian Agricultural Research Institute, Pusa, New Delhi-110012

Corresponding author's e-mail: [rajni.verma@snu.ac.kr](mailto:rajni.verma@snu.ac.kr); [shailesh@nplindia.org](mailto:shailesh@nplindia.org);

## Supporting Information

**Section S1:** Brief description of chemical test to test the presence of following metabolites in both plant extracts such as *A. indica* and *M. indica*.

**Test for flavonoids:** In order to confirm the presence of flavonoids, 5 ml of NaOH (10%) solution was mixed with 2 ml of each plant extract individually (*A. indica* and *M. indica*), the mixture turns yellow colour, signifying the presence of flavonoids.

**Test for steroids:** 3 ml of plant extract and 3 ml of concentrated sulphuric acid with 3 ml of chloroform was mixed together, producing red colour in the bottom chloroform layer.

**Test for terpenoids:** Terpenoids are present, as evidenced by the reddish-brown color that results from mixing 5 ml of plant extract with 3 ml of chloroform and sulfuric acid.

**Test for phenol:** The presence of the phenol group is shown by adding a few drops of alcoholic FeCl<sub>3</sub> solution applied to 3 ml of leaf extract, which resulted in a bluish-black appearance.

**Test for saponin:** The formation of foam when the leaf extract and distilled water are rapidly agitated suggests the existence of saponins.

**Test for protein:** Nitric acid solution was added dropwise in 2 ml of leaf extract to generate dark yellow color indicating the presence of proteins.

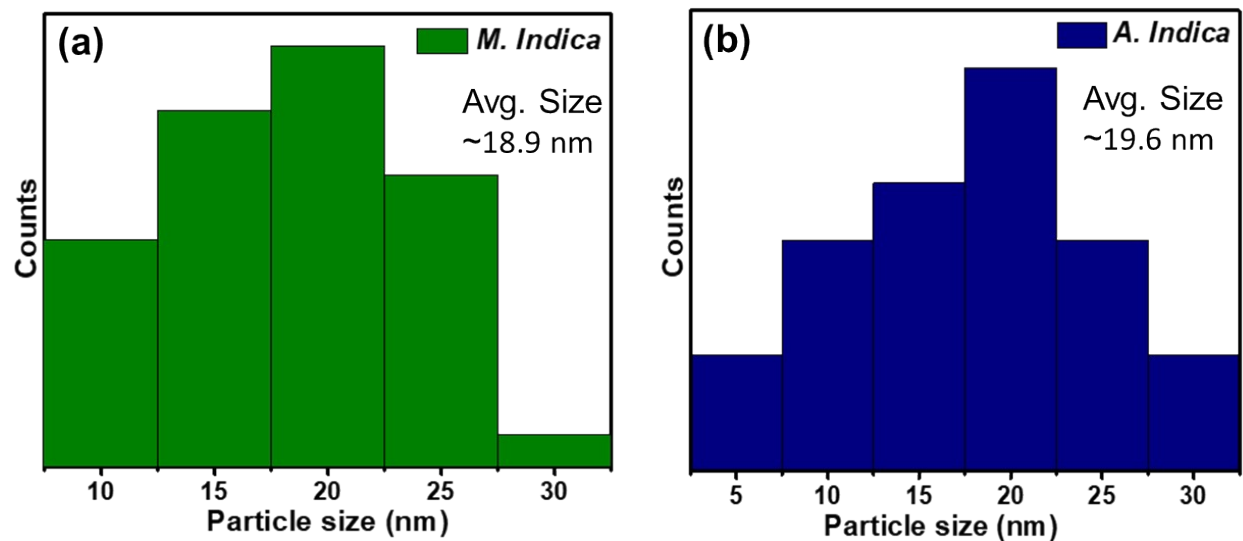

**Figure S1:** Particle size distribution of the TiO<sub>2</sub> NPs prepared using *M. indica* and *A. indica* plant extracts, respectively.

Table S1:  
TiO<sub>2</sub> NPs

EDX of

| Element    | <i>A. Indica</i><br>(Ti) | <i>A. Indica</i><br>(O) | <i>M. Indica</i><br>(Ti) | <i>M. Indica</i><br>(O) |
|------------|--------------------------|-------------------------|--------------------------|-------------------------|
| Weight (%) | 48.97                    | 51.03                   | 51.92                    | 48.08                   |
| Atomic (%) | 24.27                    | 75.73                   | 26.50                    | 73.50                   |

synthesized using *A. indica* and *M. indica*.
